# Supplementary material for: Diversity of Water Yam (Dioscorea alata L.) Accessions from Côte d’Ivoire Based on SNP Markers and Agronomic Traits
Source: MDPI journal article supplement (doi:10.3390/plants10122562), 2021-11-24
Supplement: s1 [file s1]

Table S1: List of accessions and variety groups evaluated in the study.

| Accessions | VRG      | Accessions | VRG      | Accessions | VRG      | Accessions | VRG      |
|------------|----------|------------|----------|------------|----------|------------|----------|
| civcda 002 | Brazo    | civcda 086 | Betebete | civcda 354 | Betebete | civcda 375 | Betebete |
| civcda 022 | Florido  | civcda 088 | Betebete | civcda 359 | nza      | civcda 376 | Florido  |
| civcda 035 | Douoble  | civcda 101 | Betebete | civcda 367 | nza      | civcda 383 | Douoble  |
| civcda 050 | Brazo    | civcda 105 | Florido  | civcda 368 | Florido  | civcda 388 | nza      |
| civcda 053 | Betebete | civcda 109 | Florido  | civcda 373 | Betebete | civcda 393 | nza      |
| civcda 059 | Brazo    | civcda 110 | Brazo    | civcda 377 | Betebete | civcda 010 | Brazo    |
| civcda 061 | Brazo    | civcda 115 | Hybrid   | civcda 378 | Florido  | civcda 011 | Florido  |
| civcda 062 | Brazo    | civcda 119 | Hybrid   | civcda 387 | Betebete | civcda 030 | Florido  |
| civcda 100 | Douoble  | civcda 122 | Hybrid   | civcda 389 | Douoble  | civcda 036 | Florido  |
| civcda 114 | Hybrid   | civcda 125 | Hybrid   | civcda 390 | nza      | civcda 038 | Florido  |
| civcda 121 | Hybrid   | civcda 126 | Hybrid   | civcda 442 | Florido  | civcda 047 | Florido  |
| civcda 130 | Hybrid   | civcda 127 | Hybrid   | civcda 445 | Betebete | civcda 065 | Florido  |
| civcda 133 | Hybrid   | civcda 132 | Hybrid   | civcda 008 | Brazo    | civcda 068 | Betebete |
| civcda 142 | Hybrid   | civcda 140 | Hybrid   | civcda 009 | Douoble  | civcda 111 | Douoble  |
| civcda 146 | Hybrid   | civcda 144 | Hybrid   | civcda 015 | Florido  | civcda 112 | Betebete |
| civcda 148 | Hybrid   | civcda 151 | Hybrid   | civcda 044 | Betebete | civcda 116 | Hybrid   |
| civcda 153 | Hybrid   | civcda 155 | Hybrid   | civcda 060 | Douoble  | civcda 134 | Hybrid   |
| civcda 158 | Hybrid   | civcda 157 | Hybrid   | civcda 063 | Florido  | civcda 135 | Hybrid   |
| civcda 162 | Hybrid   | civcda 160 | Hybrid   | civcda 066 | Florido  | civcda 136 | Hybrid   |
| civcda 166 | Hybrid   | civcda 163 | Hybrid   | civcda 083 | Betebete | civcda 138 | Hybrid   |
| civcda 167 | Hybrid   | civcda 168 | Hybrid   | civcda 106 | Douoble  | civcda 141 | Hybrid   |
| civcda 207 | Betebete | civcda 172 | Hybrid   | civcda 113 | Douoble  | civcda 145 | Hybrid   |
| civcda 214 | Douoble  | civcda 175 | Hybrid   | civcda 117 | Hybrid   | civcda 147 | Hybrid   |
| civcda 223 | Betebete | civcda 179 | Hybrid   | civcda 129 | Hybrid   | civcda 150 | Hybrid   |
| civcda 229 | nza      | civcda 180 | Hybrid   | civcda 137 | Hybrid   | civcda 156 | Hybrid   |
| civcda 232 | Betebete | civcda 187 | Hybrid   | civcda 149 | Hybrid   | civcda 178 | Hybrid   |
| civcda 307 | Douoble  | civcda 189 | Hybrid   | civcda 152 | Hybrid   | civcda 202 | Florido  |
| civcda 310 | nza      | civcda 191 | Hybrid   | civcda 165 | Hybrid   | civcda 217 | Betebete |
| civcda 320 | Florido  | civcda 195 | Hybrid   | civcda 170 | Hybrid   | civcda 218 | Douoble  |
| civcda 331 | Douoble  | civcda 205 | Florido  | civcda 174 | Hybrid   | civcda 245 | Betebete |
| civcda 332 | Florido  | civcda 208 | nza      | civcda 184 | Hybrid   | civcda 266 | nza      |
| civcda 333 | Florido  | civcda 209 | nza      | civcda 186 | Hybrid   | civcda 305 | Betebete |
| civcda 339 | Douoble  | civcda 216 | Betebete | civcda 192 | Hybrid   | civcda 327 | Betebete |
| civcda 341 | Betebete | civcda 224 | Florido  | civcda 235 | Douoble  | civcda 349 | nza      |
| civcda 347 | Betebete | civcda 228 | Florido  | civcda 236 | Douoble  | civcda 355 | Florido  |
| civcda 352 | Betebete | civcda 244 | Betebete | civcda 241 | Betebete | civcda 358 | nza      |
| civcda 361 | nza      | civcda 253 | Betebete | civcda 252 | Betebete | civcda 364 | nza      |
| civcda 363 | Florido  | civcda 259 | Betebete | civcda 268 | Betebete | civcda 369 | Florido  |
| civcda 366 | Betebete | civcda 272 | Betebete | civcda 275 | Betebete | civcda 386 | Betebete |
| civcda 441 | nza      | civcda 311 | nza      | civcda 314 | Florido  | civcda 446 | Florido  |
| civcda 443 | Betebete | civcda 316 | Florido  | civcda 322 | nza      | civcda 447 | Hybrid   |

| Accessions         | VRG      | Accessions | VRG      | Accessions | VRG      |
|--------------------|----------|------------|----------|------------|----------|
| civda 014          | Brazo    | civda 317  | Betebete | civda 329  | Betebete |
| civda 026          | Betebete | civda 325  | nza      | civda 343  | nza      |
| civda 039          | Florido  | civda 326  | Betebete | civda 346  | Betebete |
| civda 040          | Florido  | civda 337  | nza      | civda 350  | Betebete |
| civda 041          | Florido  | civda 344  | Betebete | civda 351  | Florido  |
| civda 046          | Betebete | civda 345  | Florido  | civda 365  | Betebete |
| civda 064          | Florido  | civda 348  | Betebete | civda 370  | Betebete |
| civda 080          | Betebete | civda 353  | Florido  | civda 374  | Betebete |
| VRG Varietal group |          |            |          |            |          |
