# Supplementary material for: Diversity of Water Yam (Dioscorea alata L.) Accessions from Côte d’Ivoire Based on SNP Markers and Agronomic Traits
Source: MDPI journal article supplement (doi:10.3390/plants10122562), 2021-11-24
Supplement: s1 [file s1]

**Table S2.** Weather parameters during observation periods in Bouaké, Côte d'Ivoire

| Observation<br>Periods             | Weather<br>Parameters | Year  |       |
|------------------------------------|-----------------------|-------|-------|
|                                    |                       | 2018  | 2019  |
| 2 months after<br>planting<br>(P1) | Rainfall (mm)         | 234.7 | 253.6 |
|                                    | Number of rainy days  | 13    | 7     |
|                                    | Temperature (°C)      | 24.1  | 23.7  |
|                                    | Wind speed (km/h)     | 9     | 14    |
|                                    | Relative humidity (%) | 93    | 88    |
| 3 months after<br>planting<br>(P2) | Rainfall (mm)         | 82    | 116.1 |
|                                    | Number of rainy days  | 8     | 9     |
|                                    | Temperature (°C)      | 24.3  | 24.1  |
|                                    | Wind speed (km/h)     | 8     | 10    |
|                                    | Relative humidity (%) | 82    | 87    |
| 4 months after<br>planting<br>(P3) | Rainfall (mm)         | 0     | 147.7 |
|                                    | Number of rainy days  | 0     | 10    |
|                                    | Temperature (°C)      | 26.2  | 24.3  |
|                                    | Wind speed (km/h)     | 8     | 10    |
|                                    | Relative humidity (%) | 73    | 85    |

Source: GDSME, CNRA and [www.historique-meteo.net](http://www.historique-meteo.net)
